# Supplementary material for: Facile transfer of surface plasmon electrons of Au-NPs to Zn3V2O8surfaces: a case study of sunlight driven H2generation from water splitting
Source: Royal Society of Chemistry journal article supplement (doi:10.1039/d3na00148b), 2023-01-01
Supplement: d3na00148b1.pdf [file d3na00148b1.pdf]

## Supporting information

### Facile transfer of surface plasmon electrons of Au-NPs to Zn<sub>3</sub>V<sub>2</sub>O<sub>8</sub> surfaces: A case study of sun-light driven H<sub>2</sub> generation from water splitting†

Muhammad Jalil<sup>a</sup>, Khezina Rafiq<sup>a\*</sup>, Muhammad Zeeshan Abid<sup>a</sup>, Abdul Rauf<sup>a</sup>, Shuxin Wang<sup>b</sup>, Shahid Iqbal<sup>c</sup> and Ejaz Hussain<sup>a\*</sup>

<sup>a</sup>Institute of Chemistry, Inorganic Materials Laboratory 52S, The Islamia University of Bahawalpur–63100, Pakistan

<sup>b</sup>College of Materials Science and Engineering, Qingdao University of Science and Technology, Qingdao–266042, P.R. China

<sup>c</sup>Department of Physics, Illinois Wesleyan University, IL–61702–2900, USA

**Table S1: Crystallite size calculation by applying Scherer formula**

| Catalyst                                         | FWHM   | 2θ      | D (nm) | Eg (eV) |
|--------------------------------------------------|--------|---------|--------|---------|
| Zn <sub>3</sub> V <sub>2</sub> O <sub>8</sub>    | 0.5848 | 36.5270 | 14.95  | 3.0     |
| Au@Zn <sub>3</sub> V <sub>2</sub> O <sub>8</sub> | 0.4645 | 36.2070 | 18.80  | 2.9     |

**Scherer Formula:** To calculate the crystallite size of Zn<sub>3</sub>V<sub>2</sub>O<sub>8</sub> and Au@Zn<sub>3</sub>V<sub>2</sub>O<sub>8</sub> photocatalysts Scherer equation is used which is given below.

$$D = \frac{k\lambda}{\beta \cos\theta}$$

Where D is crystallite size, k is Scherer constant which is equal to 0.9, λ is wavelength which is equal to the 0.15, β is full width at half maximum (FWHM) of peaks and θ is the angle of diffraction.

**Table S2: XRD parameters of Zn<sub>3</sub>V<sub>2</sub>O<sub>8</sub>**

| JCPDS # PDF 34-0378 Zn <sub>3</sub> V <sub>2</sub> O <sub>8</sub> Orthorhombic |         |        |        |         |
|--------------------------------------------------------------------------------|---------|--------|--------|---------|
| Sr. No.                                                                        | 2-Theta | Theta  | d(Å)   | (h k l) |
| 1                                                                              | 15.365  | 7.682  | 5.7620 | (0 2 0) |
| 2                                                                              | 18.741  | 9.370  | 4.7310 | (1 2 0) |
| 3                                                                              | 26.450  | 13.225 | 3.3670 | (2 2 0) |
| 4                                                                              | 27.080  | 13.540 | 3.2900 | (2 1 1) |
| 5                                                                              | 29.454  | 14.727 | 3.0300 | (1 3 1) |
| 6                                                                              | 31.004  | 15.502 | 2.8820 | (0 4 0) |
| 7                                                                              | 34.910  | 17.455 | 2.5680 | (1 2 2) |
| 8                                                                              | 35.980  | 17.990 | 2.4940 | (3 2 0) |
| 9                                                                              | 36.464  | 18.232 | 2.4620 | (3 1 1) |
| 10                                                                             | 43.114  | 21.557 | 2.0964 | (0 4 2) |
| 11                                                                             | 43.301  | 21.650 | 2.0878 | (1 5 1) |
| 12                                                                             | 48.606  | 24.303 | 1.8716 | (1 6 0) |
| 13                                                                             | 57.703  | 28.851 | 1.5963 | (1 6 2) |
| 14                                                                             | 58.440  | 29.220 | 1.5779 | (3 6 0) |
| 15                                                                             | 60.562  | 30.281 | 1.5276 | (0 0 4) |
| 16                                                                             | 62.973  | 31.486 | 1.4748 | (4 4 2) |
| 17                                                                             | 64.606  | 32.303 | 1.4414 | (0 8 0) |

**Table S3: Comparison of metal vanadates photocatalysts for hydrogen production reported in literature.**

| Catalyst                                                           | Light source | Catalyst amount | Sacrificial reagent | H <sub>2</sub> production                 | Ref.          |
|--------------------------------------------------------------------|--------------|-----------------|---------------------|-------------------------------------------|---------------|
| Au@Zn <sub>3</sub> V <sub>2</sub> O <sub>8</sub>                   | sunlight     | 5 mg            | 5 % Ethanol         | 7.50 mmol g <sup>-1</sup> h <sup>-1</sup> | Present study |
| BiVO <sub>4</sub> /Ti <sub>3</sub> C <sub>2</sub>                  | ≠            | ≠               | -                   | 0.15 mmol g <sup>-1</sup> h <sup>-1</sup> | [1]           |
| CeO <sub>2</sub> /CeVO <sub>4</sub> /V <sub>2</sub> O <sub>5</sub> | ≠            | ≠               | -                   | 0.18 mmol g <sup>-1</sup> h <sup>-1</sup> | [2]           |
| Cr:Cu <sub>3</sub> V <sub>2</sub> O <sub>8</sub>                   | ≠            | ≠               | 5 % NaI             | 0.28 mmol g <sup>-1</sup> h <sup>-1</sup> | [3]           |

**Table S4: Recyclability test for most active photocatalysts ( $\text{Au}_{1.0}@\text{Zn}_3\text{V}_2\text{O}_8$ ).**

| Photocatalyst<br>( $\text{Au}_{1.0}@\text{Zn}_3\text{V}_2\text{O}_8$ ) | Time (h) |       |       |       |       |       | $\text{H}_2$ generation<br>mmol $\text{g}^{-1}$ |
|------------------------------------------------------------------------|----------|-------|-------|-------|-------|-------|-------------------------------------------------|
|                                                                        | 1        | 2     | 3     | 4     | 5     | 6     |                                                 |
| 1 <sup>st</sup> run                                                    | 3.59     | 10.56 | 17.83 | 25.40 | 33.14 | 41.14 | mmol $\text{g}^{-1}$                            |
| 2 <sup>nd</sup> run                                                    | 3.58     | 10.30 | 17.50 | 24.80 | 32.30 | 40.20 | ≈                                               |
| 3 <sup>rd</sup> run                                                    | 3.41     | 10.16 | 17.34 | 24.07 | 31.64 | 39.14 | ≈                                               |

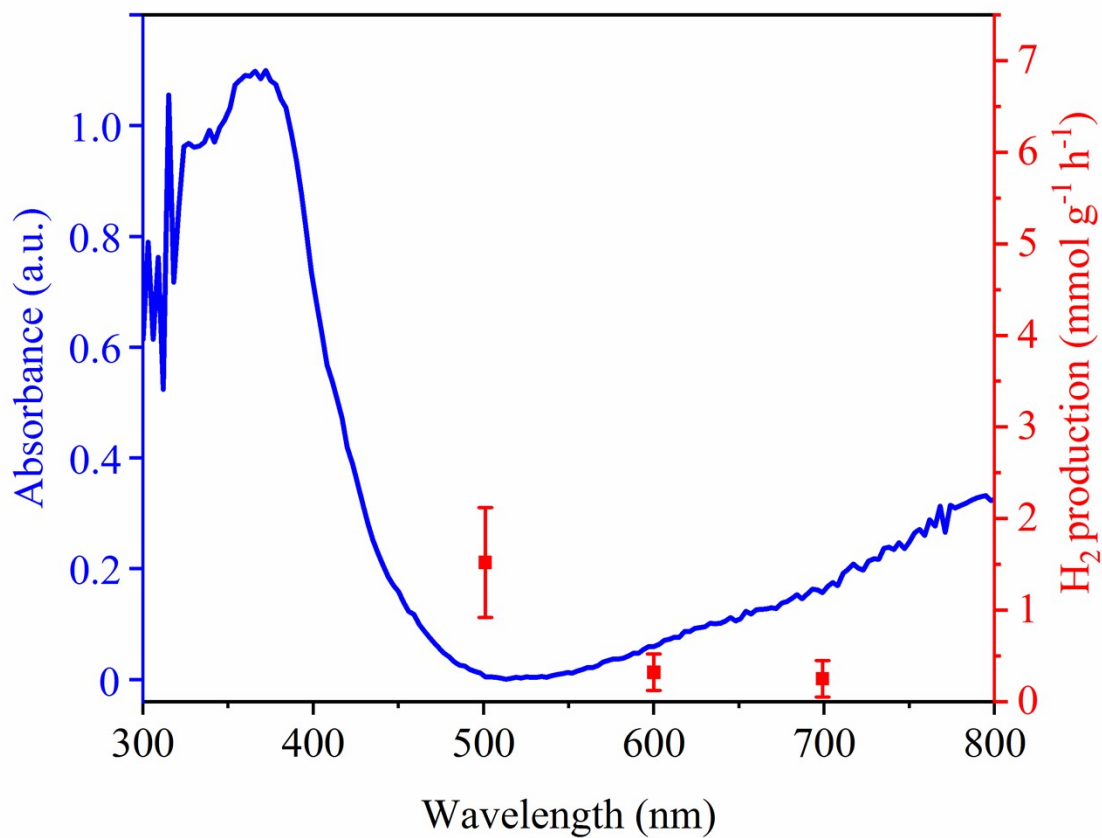

**Figure S1: Visible light induced SPR effect of Au metal contents over  $\text{Zn}_3\text{V}_2\text{O}_8$  for  $\text{H}_2$  productions.**

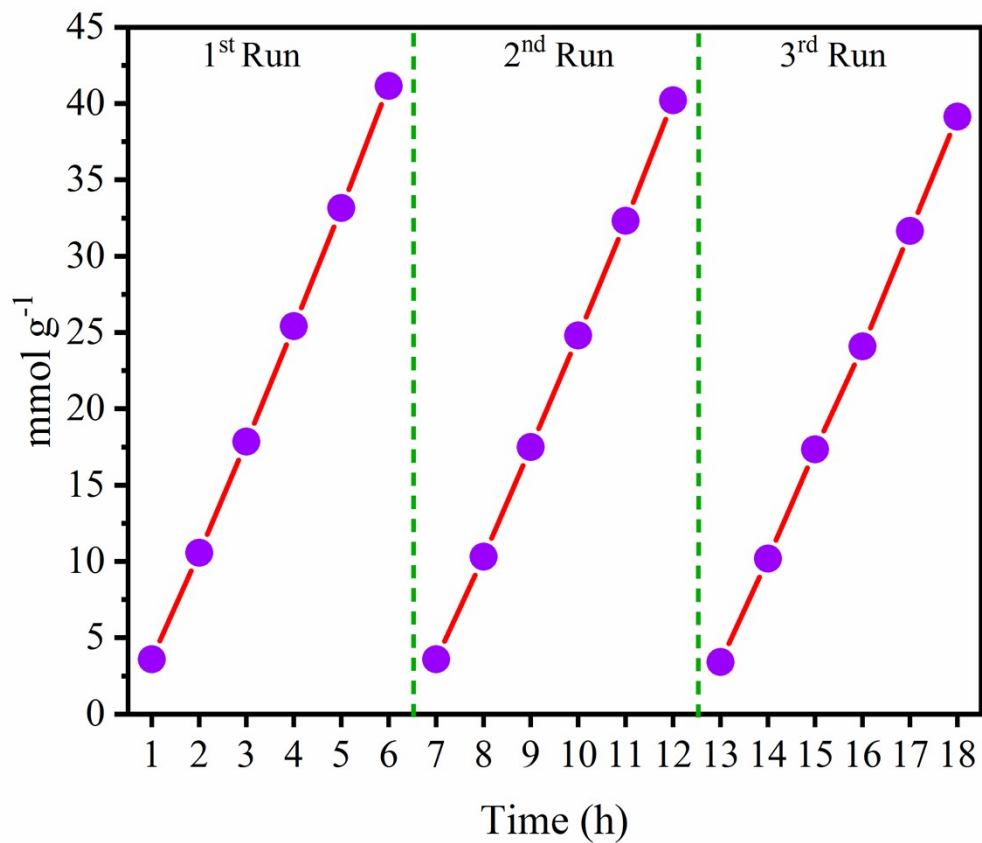

**Figure S2: Recyclability test of Au@Zn<sub>3</sub>V<sub>2</sub>O<sub>8</sub> photocatalysts.**

## Reference:

1. Li, Y., et al., *2D/2D heterostructure of ultrathin BiVO<sub>4</sub>/Ti<sub>3</sub>C<sub>2</sub> nanosheets for photocatalytic overall Water splitting*. Applied Catalysis B: Environmental, 2021. **285**: p. 119855.
2. Cui, X., et al., *Self-generating CeVO<sub>4</sub> as conductive channel within CeO<sub>2</sub>/CeVO<sub>4</sub>/V<sub>2</sub>O<sub>5</sub> to induce Z-scheme-charge-transfer driven photocatalytic degradation coupled with hydrogen production*. International Journal of Hydrogen Energy, 2019. **44**(43): p. 23921-23935.
3. Cárdenas Morcoso, D., *Chromium-doped copper vanadate films (Cr: Cu<sub>3</sub>V<sub>2</sub>O<sub>8</sub>) as photoanodes for water splitting*. 2017.
